# Supplementary material for: (−)-Epigallocatechin-3-gallate (EGCG) inhibits starch digestion and improves glucose homeostasis through direct or indirect activation of PXR/CAR-mediated phase II metabolism in diabetic mice
Source: Royal Society of Chemistry journal article supplement (doi:10.1039/c8fo01293h), 2018-01-01
Supplement: c8fo01293h1.pdf [file c8fo01293h1.pdf]

Supplementary Table S1. Antibodies information used in the study

| Antibody       | Catalogue  | Company                |
|----------------|------------|------------------------|
| CAR            | 21042-1-AP | Protein Tech           |
| PXR            | 15607-1-AP | Protein Tech           |
| SULT1A1        | 10911-2-AP | Protein Tech           |
| UGT1A1         | SC-271268  | Santa Cruz             |
| PEPCK          | Sc-377027  | Santa Cruz             |
| G-6-Pase       | Sc-398155  | Protein Tech           |
| Nrf2           | 16396-1-AP | Protein Tech           |
| Keap-1         | 10503-2-AP | Protein Tech           |
| SREBP-1        | SC-365513  | Santa Cruz             |
| GLUT2          | 20436-1-AP | Protein Tech           |
| GAPDH          | 60004-1-Ig | Protein Tech           |
| $\beta$ -actin | BM0627     | Boster Biological Tech |

Supplementary Table S2. Composition of the normal chow diet and high-fat diet

|                    | High fat diet<br>(TP23000) | normal chow diet<br>(TP23302) |
|--------------------|----------------------------|-------------------------------|
| Casein             | 240                        | 191.2                         |
| Corn starch        | 73                         | 496.7                         |
| Maltodextrin       | 120                        | 112.3                         |
| Sucrose            | 203                        | 63.8                          |
| Soybean oil        | 30                         | 23.9                          |
| Lard               | 196                        | 16.1                          |
| Cellulose          | 60                         | 47.8                          |
| Mineral mix M1020  | 59                         | 35.7                          |
| Vitamin V1010      | 12                         | 7.3                           |
| L-cystine          | 4                          | 2.87                          |
| Choline Bitartrate | 3                          | 2.39                          |
| TBHQ               | 0.045                      | 0.008                         |
| Total content      | 1000                       | 1000                          |
| Protein            | 19.4%                      | 19%                           |
| Fat                | 45%                        | 10%                           |
| Carbohydrate       | 35.6%                      | 71%                           |
| Total energy       | 4.5 kCal/g                 | 3.6 kCal/g                    |

Supplementary Table S3. Sequences of the primers

| Name              | Primer  | Sequence                            | Size  |
|-------------------|---------|-------------------------------------|-------|
| $\beta$ -actin    | Forward | 5'- CACGATGGAGGGGCCGACTCATC -<br>3' | 240bp |
|                   | Reverse | 5'- TAAAGACCTCTATGCCAACACAGT -3     |       |
| Mus CAR           | Forward | 5'- CTCTCCGGTCCCTAACC-3'            | 148bp |
|                   | Reverse | 5'- CTGCGTCCCTCCATCTTGT-3'          |       |
| Mus PXR           | Forward | 5'- CTTCAAATCTGCCGTGTATG-3'         | 169bp |
|                   | Reverse | 5'- ACTGCCGTCGTGTCTTCC-3'           |       |
| Mus G-6-P         | Forward | 5'- TCTTCCTGTTTGCCCTCG-3            | 231bp |
|                   | Reverse | 5'- TCGGCTTGGTGCCATTTT-3            |       |
| Mus PEPCK         | Forward | 5'-TCATCATCACCCAAGAGCA-3            | 225bp |
|                   | Reverse | 5'-CCACCACATAGGGCGAGT-3             |       |
| Mus SULT1A1       | Forward | 5'- CCCACGGATCATTAAGAC-3'           | 213bp |
|                   | Reverse | 5'- CACGACCCATAGGACACT-3'           |       |
| Mus UGT1A1        | Forward | 5'- CTTGGACGGACTGCCTTTA-3'          | 118bp |
|                   | Reverse | 5'- CATTGTGCAGCAGGTGGG-3'           |       |
| Mus SULT2B1b      | Forward | 5'-CATGTCCAATACTCGCTGC -3           | 197bp |
|                   | Reverse | 5'-CAGGGCTGCTATCCTCTTC -3           |       |
| Mus SREBP1c       | Forward | 5'-CCCACCTCAAACCTGGATCT-3           | 229bp |
|                   | Reverse | 5'-AAGCAGCAAGATGTCCTCCT-3           |       |
| Mus ACC           | Forward | 5'- AAAGGCTATGTGAAGGATG-3           | 144bp |
|                   | Reverse | 5'- TCTGAAGAGGTTAGGGAAG-3           |       |
| Mus FAS           | Forward | 5'- GCCTCCGTGGACCTTATC-3            | 183bp |
|                   | Reverse | 5'- ACCCAAGTCCTCGCCATA-3            |       |
| Mus PGC1 $\alpha$ | Forward | 5'-GGAGTCTGAAAGGGCCAAAC -3          | 180bp |
|                   | Reverse | 5'-TAGCTGTCTCCATCATCCCG -3          |       |
| Mus CREB          | Forward | 5'-GCTGGCTAACAATGGTACGG -3          | 230bp |
|                   | Reverse | 5'-CCATAACAACCTCCAGGGGCA -3         |       |
| Mus CD36          | Forward | 5'-AGCCTTCACTGTCTGTTGGA-3           | 192bp |
|                   | Reverse | 5'-GGAATGGATCTTTGTAACCCCA -3        |       |
| Mus PPAR $\gamma$ | Forward | 5'- TGCCAGTTTCGATCCGTAGA-3          | 187bp |
|                   | Reverse | 5'- ATCCTTGGCCCTCTGAGATG-3          |       |

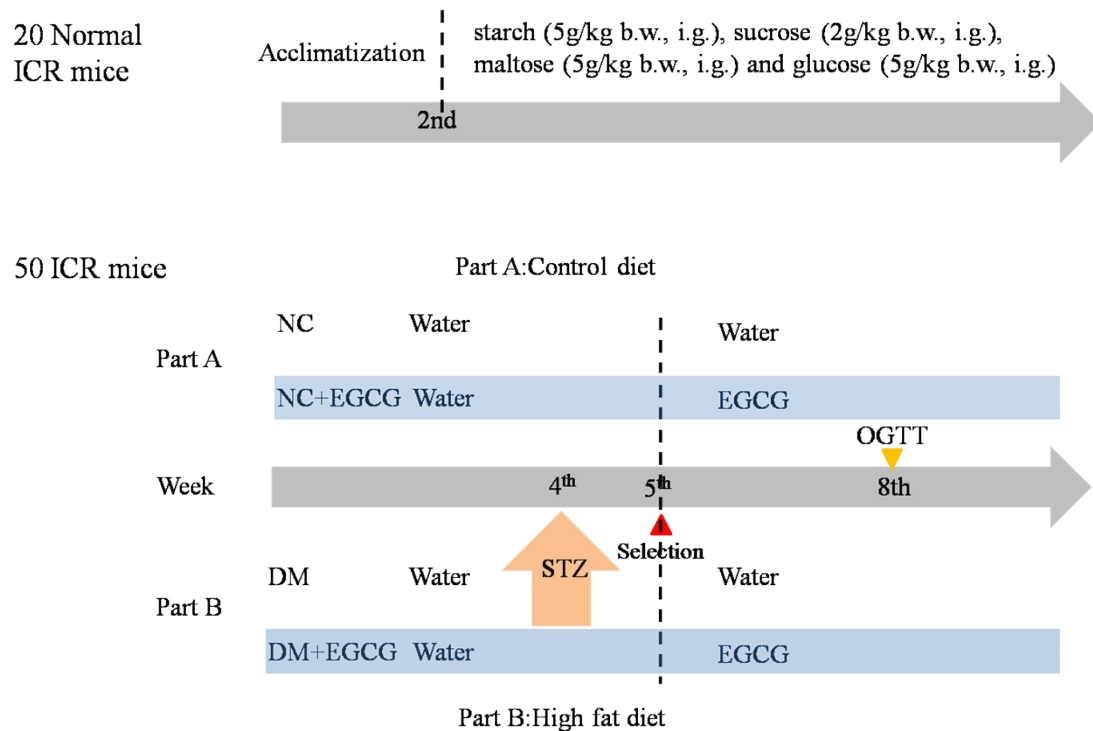

Supplementary Figure 1. Scheme of the study design describing several groups of animals.

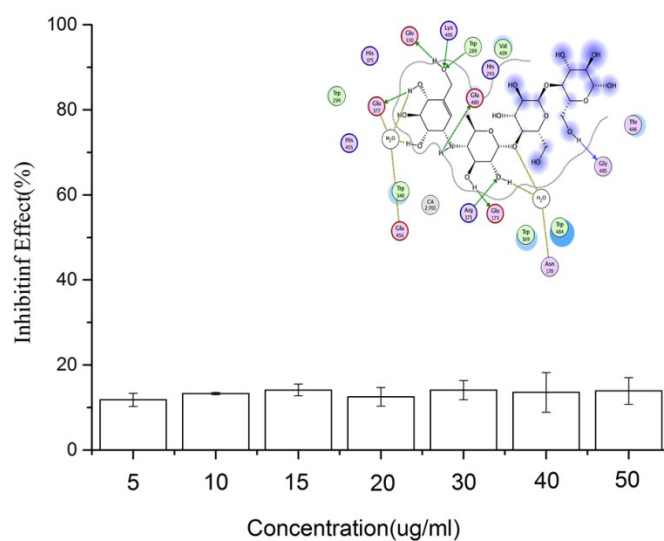

Supplementary Figure 2. The inhibitory effect of acarbose on  $\alpha$ -glucosidase

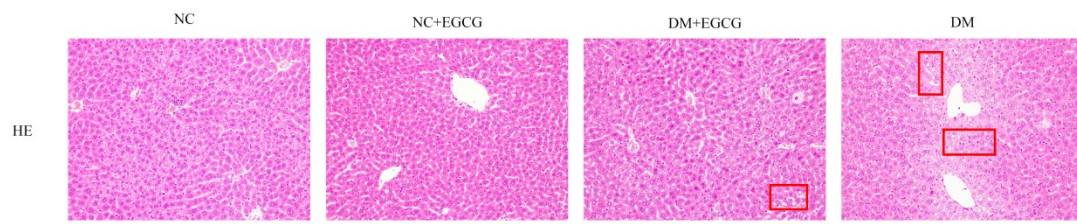

Supplementary Figure 3 The histology of liver(HE staining)

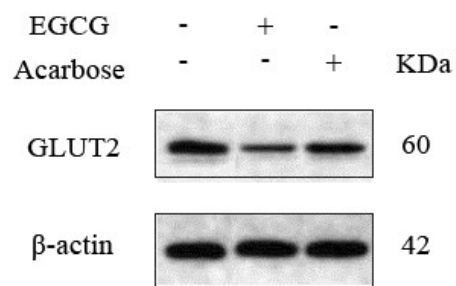

Supplementary Figure 4. EGCG inhibit GLUT2 translocation after 10min administration of glucose in small intestine.
